# Supplementary material
Source: HighWire-hosted journal article supplement (http://d2538ggaoe6cji.cloudfront.net/highwire/filestream/55940/field_highwire_adjunct_files/4/127936-5.pdf)
Supplement: 127936-5.pdf [file 127936-5.pdf]

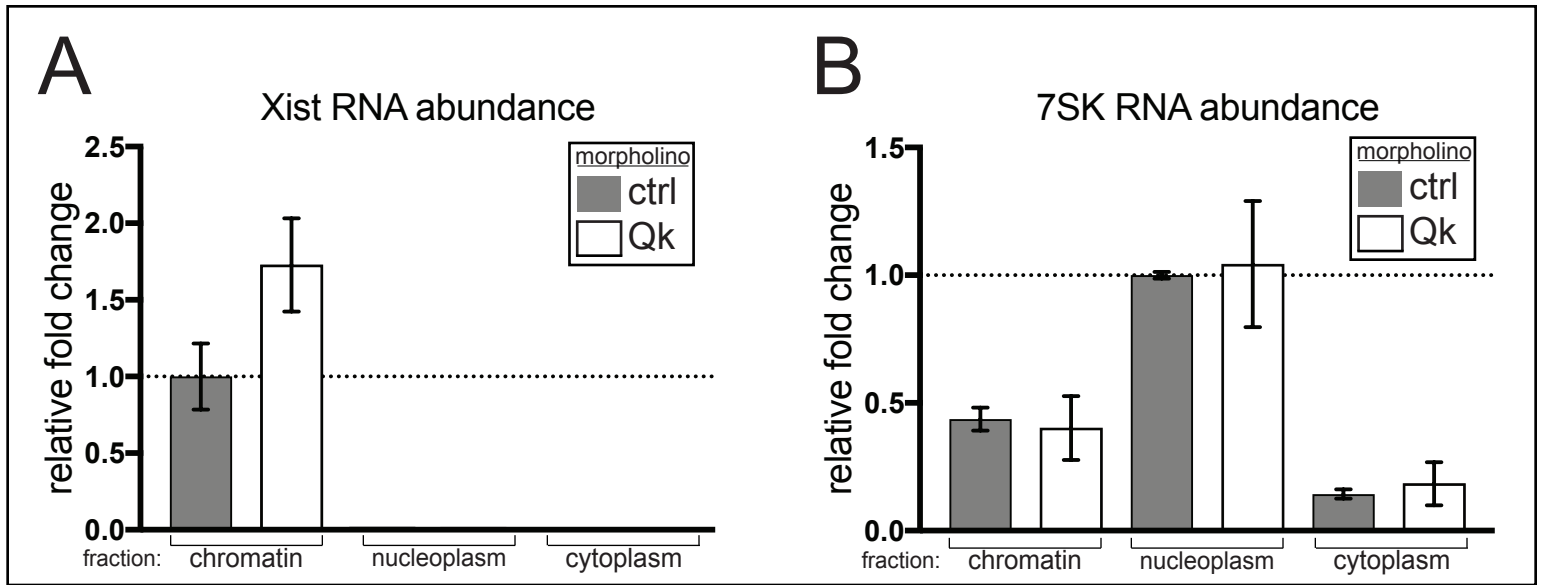

Figure S5 (supplemental to Fig 5): A. RT-qPCR of RNA extracted from chromatin, nucleoplasmic, or cytoplasmic fractions of C2C12 myoblasts treated with ctrl or Qk morpholino measuring abundance of Xist RNA normalized to Gapdh RNA, reported as mean fold change relative to ctrl +/- standard deviation of the mean from 3 independent replicates B. RT-qPCR measurement as in S5A but measuring 7SK RNA abundance relative to Gapdh RNA.
